# Supplementary material for: Novel glycylated sugar alcohols protect ESC-specific microRNAs from degradation in iPS cells
Source: PubMed Central journal article supplement — Nucleic Acids Res. 2016 Mar 21;44(10):4894–906. doi: 10.1093/nar/gkw186 (PMC4889939; doi:10.1093/nar/gkw186), 2016-03-21

# In-Depth Data Analysis Report

## miRNA Microarray Service

Experiment:  
Date: 2014-01-28  
Prepared for: Dr. Donald Chang  
W&L Institute

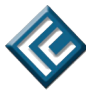

Prepared by  
**LC Sciences, LLC** | [www.LCsciences.com](http://www.LCsciences.com) | [support@LCsciences.com](mailto:support@LCsciences.com)  
2575 W. Bellfort, Suite 270, Houston, Texas 77054  
Tel. 713 664-7087, Fax 713 664-8181

## I. Statistic Test and Clustering Analysis

### 1. T-test

Test No. T-test-01  
Test Name: #2 vs #1

| Group No. | Sample Name | Group Name | Pair | Comment |
|-----------|-------------|------------|------|---------|
| 1         | #1          | #1         |      |         |
| 2         | #2          | #2         |      |         |

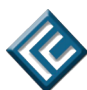

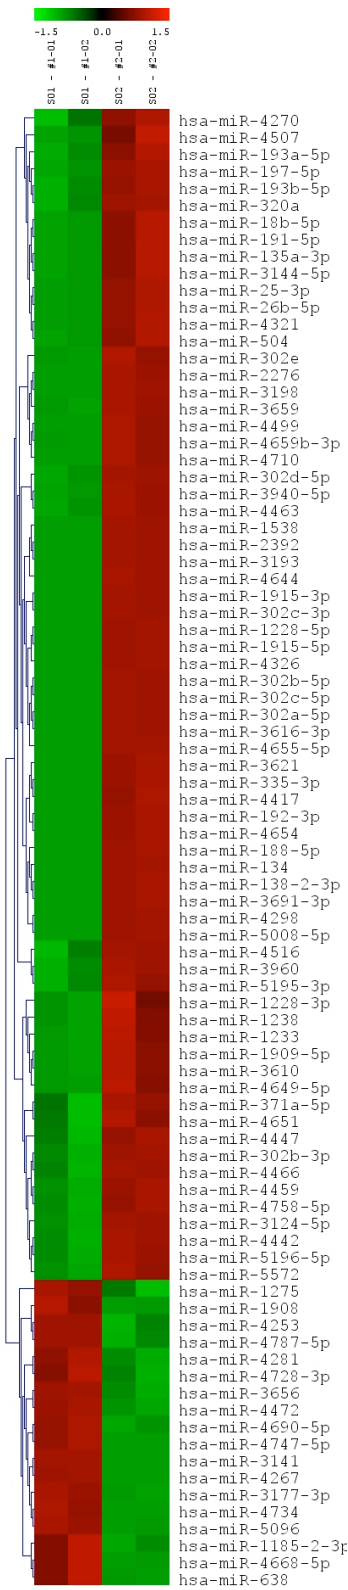

p-value < 0.10



|                                                                                         |                  |          | Group 1 | Group 2 |              |
|-----------------------------------------------------------------------------------------|------------------|----------|---------|---------|--------------|
|                                                                                         |                  |          | #1      | #2      |              |
| Rpter Index                                                                             | Reporter Name    | p-value  | Mean    | Mean    | Log2 (G2/G1) |
| 331                                                                                     | hsa-miR-302c-5p  | 1.28E-03 | 0       | 52,804  | 22.65        |
| 327                                                                                     | hsa-miR-302a-5p  | 1.38E-03 | 0       | 26,579  | 21.85        |
| 326                                                                                     | hsa-miR-302a-3p  | 1.52E-03 | 0       | 66,718  | 22.92        |
| 330                                                                                     | hsa-miR-302c-3p  | 3.51E-03 | 0       | 15,973  | 20.71        |
| 333                                                                                     | hsa-miR-302d-5p  | 2.23E-02 | 3       | 22,124  | 12.87        |
| 329                                                                                     | hsa-miR-302b-5p  | 3.09E-02 | 1       | 940     | 3.75         |
| 332                                                                                     | hsa-miR-302d-3p  | 4.86E-02 | 0       | 9,579   | 18.53        |
| 328                                                                                     | hsa-miR-302b-3p  | 4.88E-02 | 6       | 1,963   | 2.23         |
| 381                                                                                     | hsa-miR-367-3p   | 8.78E-02 | 4       | 6       | 0.52         |
| Following transcripts are statistically significant but have low signals (signal < 500) |                  |          |         |         |              |
| 1657                                                                                    | hsa-miR-4655-5p  | 7.47E-05 | 0       | 126     | 15.60        |
| 948                                                                                     | hsa-miR-1228-5p  | 8.61E-04 | 0       | 147     | 15.78        |
| 1087                                                                                    | hsa-miR-1915-5p  | 1.25E-03 | 0       | 51      | 14.55        |
| 1268                                                                                    | hsa-miR-3616-3p  | 1.48E-03 | 0       | 340     | 16.77        |
| 1474                                                                                    | hsa-miR-4326     | 2.00E-03 | 0       | 35      | 14.11        |
| 1086                                                                                    | hsa-miR-1915-3p  | 2.76E-03 | 0       | 188     | 16.07        |
| 1446                                                                                    | hsa-miR-4298     | 4.77E-03 | 0       | 62      | 14.78        |
| 1919                                                                                    | hsa-miR-5008-5p  | 5.42E-03 | 0       | 88      | 15.18        |
| 1110                                                                                    | hsa-miR-2392     | 6.06E-03 | 0       | 159     | 15.88        |
| 1237                                                                                    | hsa-miR-3193     | 6.56E-03 | 0       | 62      | 14.79        |
| 1609                                                                                    | hsa-miR-1538     | 7.09E-03 | 0       | 56      | 14.66        |
| 167                                                                                     | hsa-miR-134      | 8.27E-03 | 0       | 154     | 15.84        |
| 177                                                                                     | hsa-miR-138-2-3p | 9.03E-03 | 0       | 102     | 15.36        |
| 1639                                                                                    | hsa-miR-4644     | 9.44E-03 | 0       | 299     | 16.62        |
| 1340                                                                                    | hsa-miR-3691-3p  | 9.62E-03 | 0       | 46      | 14.44        |
| 239                                                                                     | hsa-miR-188-5p   | 1.18E-02 | 0       | 99      | 15.33        |
| 1243                                                                                    | hsa-miR-3198     | 1.35E-02 | 0       | 105     | 15.40        |
| 245                                                                                     | hsa-miR-192-3p   | 1.51E-02 | 0       | 36      | 14.14        |
| 1103                                                                                    | hsa-miR-2276     | 1.69E-02 | 0       | 161     | 15.90        |
| 1655                                                                                    | hsa-miR-4654     | 1.76E-02 | 0       | 69      | 14.90        |
| 374                                                                                     | hsa-miR-3621     | 2.00E-02 | 0       | 110     | 15.46        |
| 1211                                                                                    | hsa-miR-3177-3p  | 2.06E-02 | 402     | 76      | -2.40        |
| 357                                                                                     | hsa-miR-335-3p   | 2.18E-02 | 0       | 32      | 14.02        |
| 1479                                                                                    | hsa-miR-4417     | 2.25E-02 | 0       | 94      | 15.28        |
| 1573                                                                                    | hsa-miR-4499     | 2.26E-02 | 0       | 33      | 14.04        |
| 1661                                                                                    | hsa-miR-4659b-3p | 2.43E-02 | 0       | 33      | 14.06        |
| 63                                                                                      | hsa-miR-25-3p    | 2.91E-02 | 0       | 44      | 14.39        |
| 69                                                                                      | hsa-miR-26b-5p   | 2.94E-02 | 0       | 25      | 13.75        |
| 334                                                                                     | hsa-miR-302e     | 3.34E-02 | 0       | 40      | 14.29        |
| 1469                                                                                    | hsa-miR-4321     | 3.47E-02 | 0       | 28      | 13.90        |
| 1530                                                                                    | hsa-miR-4459     | 3.59E-02 | 66      | 135     | 1.04         |
| 520                                                                                     | hsa-miR-504      | 4.00E-02 | 0       | 32      | 14.05        |
| 1511                                                                                    | hsa-miR-4442     | 4.52E-02 | 32      | 65      | 1.02         |
| 244                                                                                     | hsa-miR-191-5p   | 4.63E-02 | 0       | 38      | 14.27        |

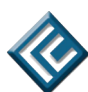

|      |                  |          |     |     |       |
|------|------------------|----------|-----|-----|-------|
| 35   | hsa-miR-16-5p    | 4.65E-02 | 0   | 41  | 14.36 |
| 1826 | hsa-miR-4758-5p  | 4.83E-02 | 7   | 74  | 3.45  |
| 169  | hsa-miR-135a-3p  | 5.26E-02 | 0   | 23  | 13.68 |
| 1166 | hsa-miR-3144-5p  | 5.31E-02 | 0   | 24  | 13.71 |
| 1077 | hsa-miR-1909-5p  | 5.37E-02 | 0   | 35  | 14.19 |
| 108  | hsa-miR-92a-1-5p | 5.40E-02 | 0   | 21  | 13.60 |
| 1537 | hsa-miR-4466     | 5.70E-02 | 58  | 137 | 1.23  |
| 1647 | hsa-miR-4649-5p  | 5.76E-02 | 187 | 385 | 1.04  |
| 1951 | hsa-miR-5195-3p  | 5.81E-02 | 49  | 316 | 2.68  |
| 1401 | hsa-miR-4253     | 5.86E-02 | 296 | 136 | -1.12 |
| 248  | hsa-miR-193a-5p  | 5.93E-02 | 7   | 62  | 3.21  |
| 952  | hsa-miR-1233     | 6.40E-02 | 0   | 34  | 14.16 |
| 1682 | hsa-miR-4668-5p  | 7.08E-02 | 315 | 70  | -2.17 |
| 959  | hsa-miR-1238     | 7.34E-02 | 0   | 25  | 13.82 |
| 1518 | hsa-miR-4447     | 7.41E-02 | 13  | 89  | 2.76  |
| 1777 | hsa-miR-4728-3p  | 7.96E-02 | 42  | 16  | -1.42 |
| 381  | hsa-miR-367-3p   | 8.78E-02 | 4   | 6   | 0.52  |
| 388  | hsa-miR-371a-5p  | 8.97E-02 | 23  | 88  | 1.92  |
| 1581 | hsa-miR-4507     | 9.15E-02 | 0   | 44  | 14.54 |
| 1418 | hsa-miR-4270     | 9.39E-02 | 29  | 113 | 1.95  |
| 1650 | hsa-miR-4651     | 9.46E-02 | 25  | 116 | 2.19  |
| 947  | hsa-miR-1228-3p  | 9.72E-02 | 0   | 52  | 14.74 |





**I. Data List**

Chip01

|                          |                                                |
|--------------------------|------------------------------------------------|
| <b>Data File</b>         |                                                |
| Folder Name              | Chip01_H20_131413CD                            |
| Data File                | 01_H20_131413CD-140127-Wen-mir302-390_Data.xls |
| Layout File              | MRA-1001B2_miRHuman_20.xls                     |
| Original Image File      | 01_H20_131413CD-140127-Wen-mir302-390.tif      |
| Processed cy3 File       | 01_H20_131413CD-140127-Wen-mir302-390cy3.tif   |
| Processed cy5 File       |                                                |
| <b>Assay Information</b> |                                                |
| Assay Date               | 01/27/2014                                     |
| Sample A                 |                                                |
| Sample ID                | mir-302                                        |
| Receiving Date           | 01/16/2014                                     |
| Labeling Dye             | cy3                                            |
| Sample B                 |                                                |
| Sample ID                |                                                |
| Receiving Date           |                                                |
| Labeling Dye             |                                                |

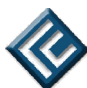

## II. Chip Content

The content of each chip is listed in a Layout File of a corresponding folder. Multiple redundant regions are included. Each region further comprises a miRNA probe region, which detects miRNA transcripts listed in Sanger miRBase Release 20.0 (<http://www.miRBase.org/>).

Multiple control probes are included in each chip. The control probes are used for quality controls of chip production, sample labeling and assay conditions. Among the control probes, PUC2PM-20B and PUC2MM-20B are the perfect match and single-based match detection probes, respectively, of a 20-mer RNA positive control sequence that is spiked into the RNA samples before labeling. One may assess assay stringency from the intensity ratio of PUC2PM-20B and PUC2MM-20B, which is normally larger than 30.

When the option for custom probes is selected, custom probes are also included.

## III. Summary of Results

Following are representative regions of chips images. From Cy3 images one may directly read miRNA profiles. The images are displayed in pseudo colors so as to expand visual dynamic range. In the images, as signal intensity increases from 1 to 65,535 the corresponding color changes from blue to green, to yellow, and to red.

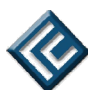



Chip: 01\_H20\_131413CD

Images: Sample A: mir-302 - cy3

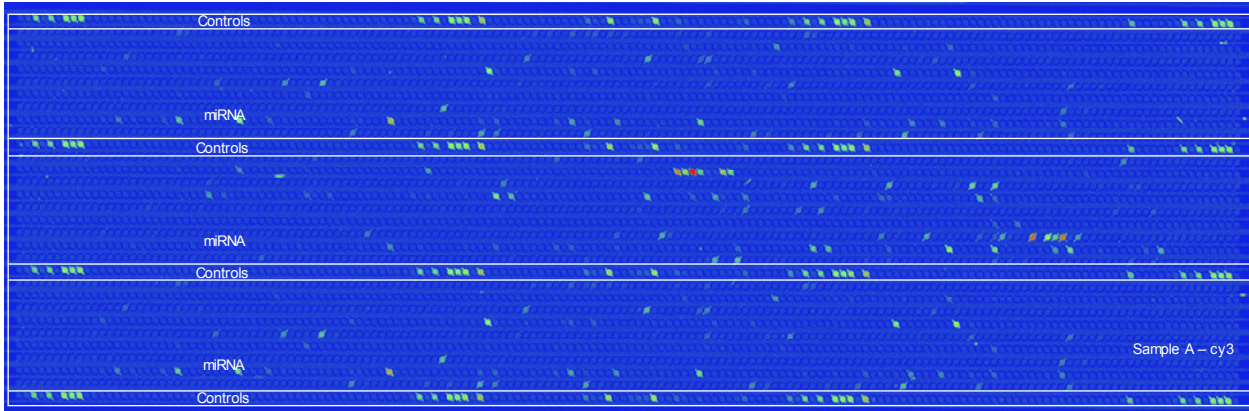

Note: these images have been rotated clockwise by 90° from a corresponding layout file



## IV. Data Analysis

We provide the result of a data analysis in data files (Chip#\_Data.xls). There are five worksheets in each file as described in the following.

- Worksheet “File Info” – provides information on data files, samples, and data analysis parameters.
- Worksheet “Simple Differential” – lists all differentially expressed transcripts with p-value < 0.01. Mature miRNAs are sorted separately according to differential ratios. The ratio values are presented in  $\log_2$  scale for quick and easy assessing differential direction as well as magnitude. A positive  $\log_2$  value indicates an upper regulation and a negative  $\log_2$  value indicates a down regulation. One can easily convert a  $\log_2$  value into a arithmetic ratio on a calculator by typing in  $2^{(\text{value})}$ . Detailed data processing statistics are listed in Worksheet “Differential Data”.
- Worksheet “Summary” – lists average signal values all transcripts on the array. The signal mean values are derived by background subtraction. Signal p-values are provided to indicate how significantly the signal is differentiated from background. In general, a signal with p-value less then 0.01 is considered to be detectable. When a signal has a detection p-value larger than 0.01, its mean value is written in grey color. Differential  $\log_2$  ratios and p-values are provided for those reporters (or probes) that are detectable in at least one of the Cy3 (or Af3) and Cy5 (or Af5) samples. In the differential calculation, the p-value is an indication on how significantly Cy3 (or Af3) and Cy5 (or Af5) signals are different from each other. In general, a p-value of less then 0.01 indicates a significant difference between Cy3 (or Af3) and Cy5 (or Af5) signals. When a reporter has a differential p-value larger than 0.01, its  $\log_2$  ratio is written in grey color.
- Worksheet “Raw Data” – lists raw data extracted from image files with corresponding probe, sequence, and location information.
- Worksheet “Processed Data” – lists processed data, including background-subtracted and normalized signals, p-values, statistically significant log ratios of Cy3 (or Af3) and Cy5 (or Af5) labeled transcripts, and a scatter plot of the processed data.

In data file package a probe layout file containing a complete list of probe positions and target sequences is included in the file directory of each chip.

## V. Suggestions for Data Analysis

In case you want to perform your own data analysis we have the following suggestions.

1. Background should be calculated from the median of 5% to 25% of low intensity cells. BKG0 and blank cells should be excluded for the background calculation.
2. All “Production\_Use\_Probes” (including BKG0, PUC2 ...) and blank cells which are listed in a supplied layout file, should be excluded during data normalization.



Supplement: supp_gkw186_nar-03760-y-2015-File010.pdf [file supp_gkw186_nar-03760-y-2015-File010.pdf]
